# Supplementary material for: Specified dynamics scheme impacts on wave-mean flow dynamics, convection, and tracer transport in CESM2 (WACCM6)
Source: Copernicus journal article supplement (doi:10.5194/acp-22-197-2022), 2022-01-07
Supplement: Supplementary file 2 [file acp-22-197-2022-supplement.pdf]

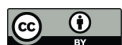

*Supplement of*

## **Specified dynamics scheme impacts on wave-mean flow dynamics, convection, and tracer transport in CESM2 (WACCM6)**

**Nicholas A. Davis et al.**

*Correspondence to:* Nicholas A. Davis ([nadavis@ucar.edu](mailto:nadavis@ucar.edu))

The copyright of individual parts of the supplement might differ from the article licence.

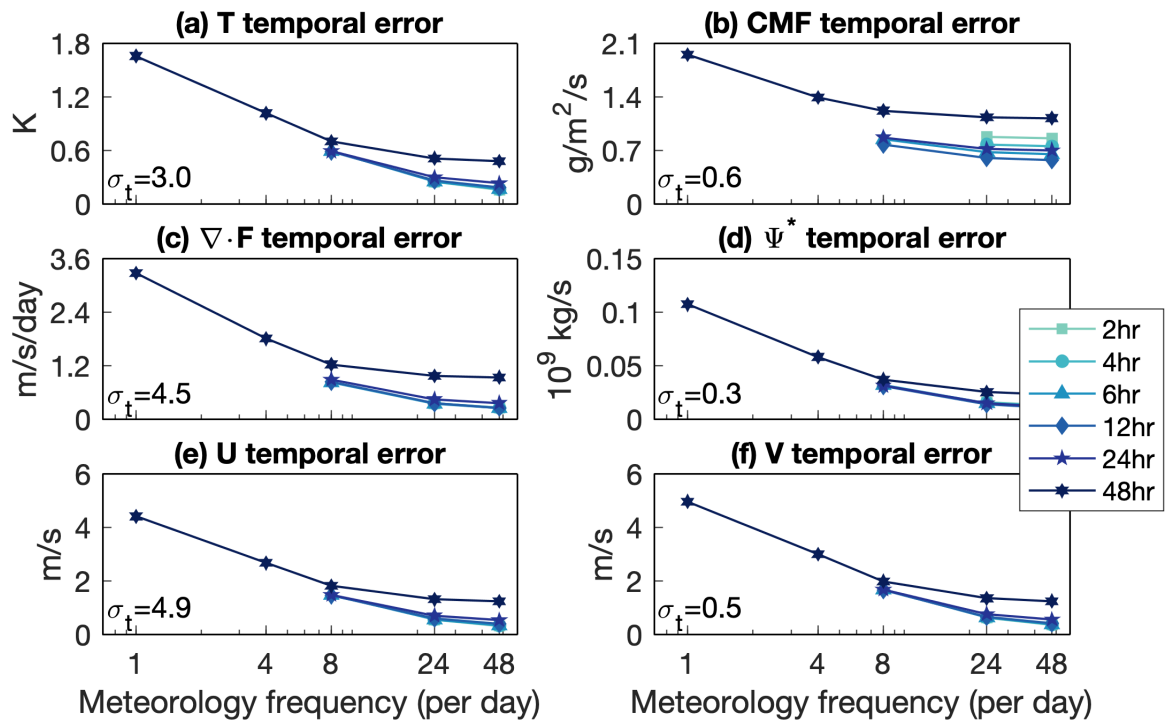

**Fig. S1:** As in Fig. 2, but with the inclusion of the zonal and meridional wind.

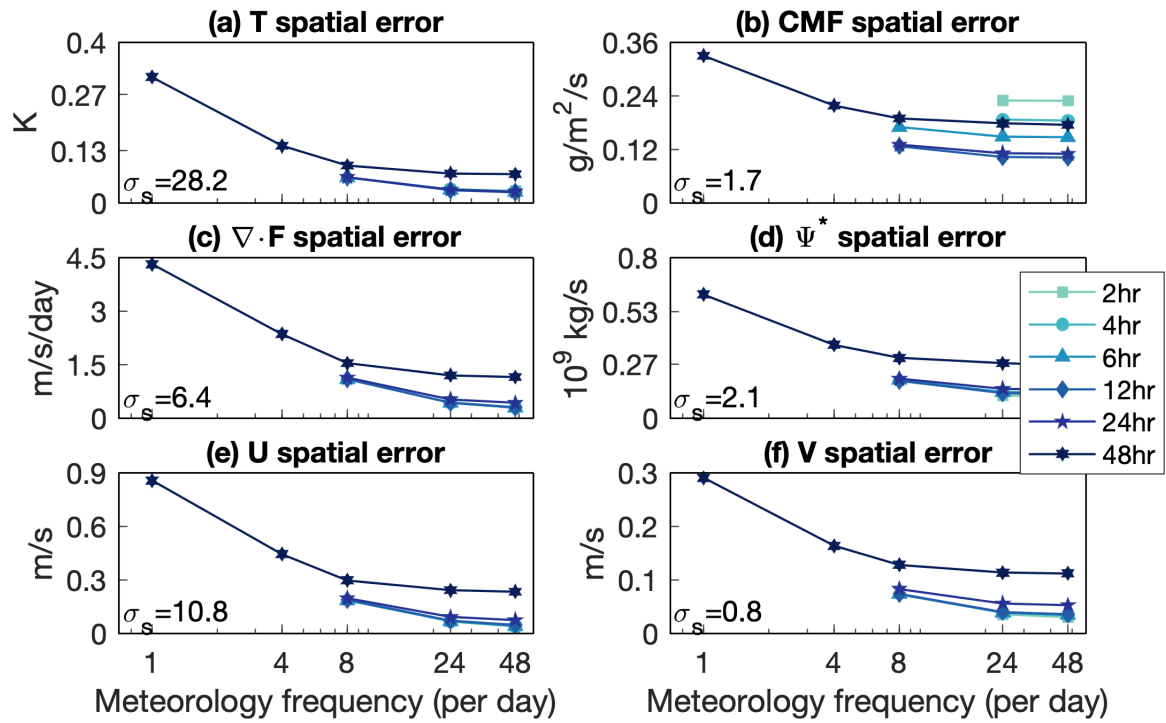

**Fig. S2:** As in Fig. 3, but with the inclusion of the zonal and meridional wind.

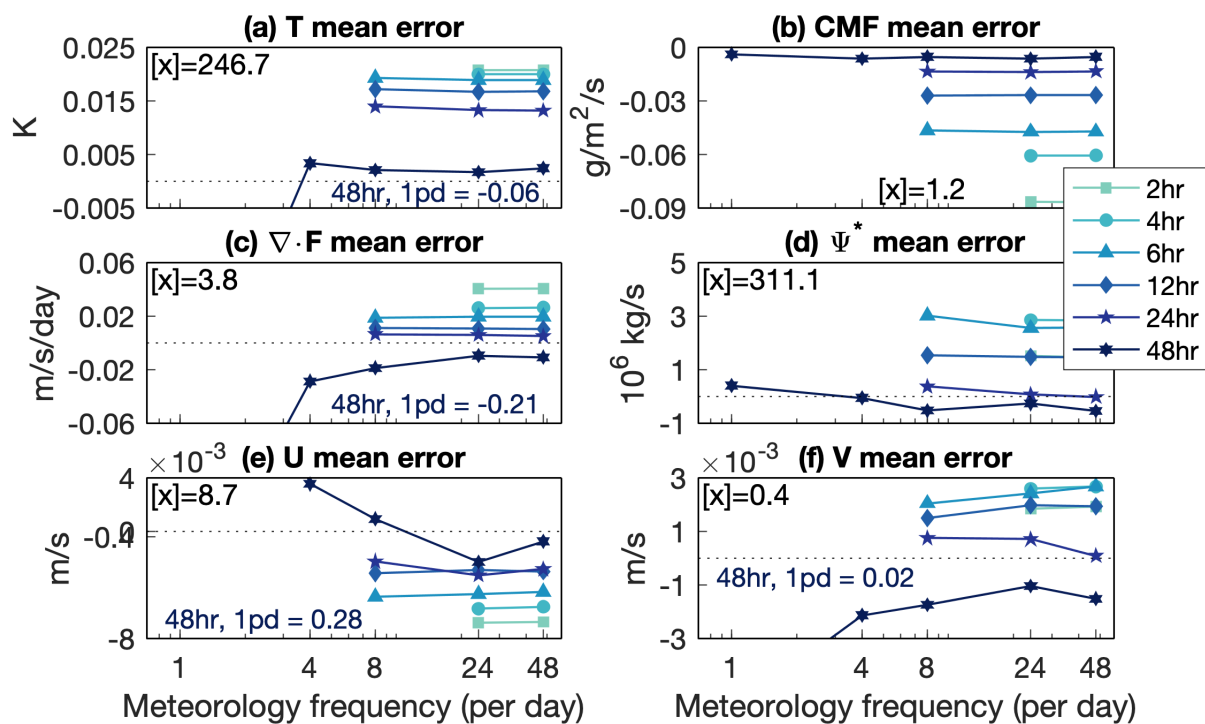

**Fig. S3:** As in Fig. 4, but with the inclusion of the zonal and meridional wind.

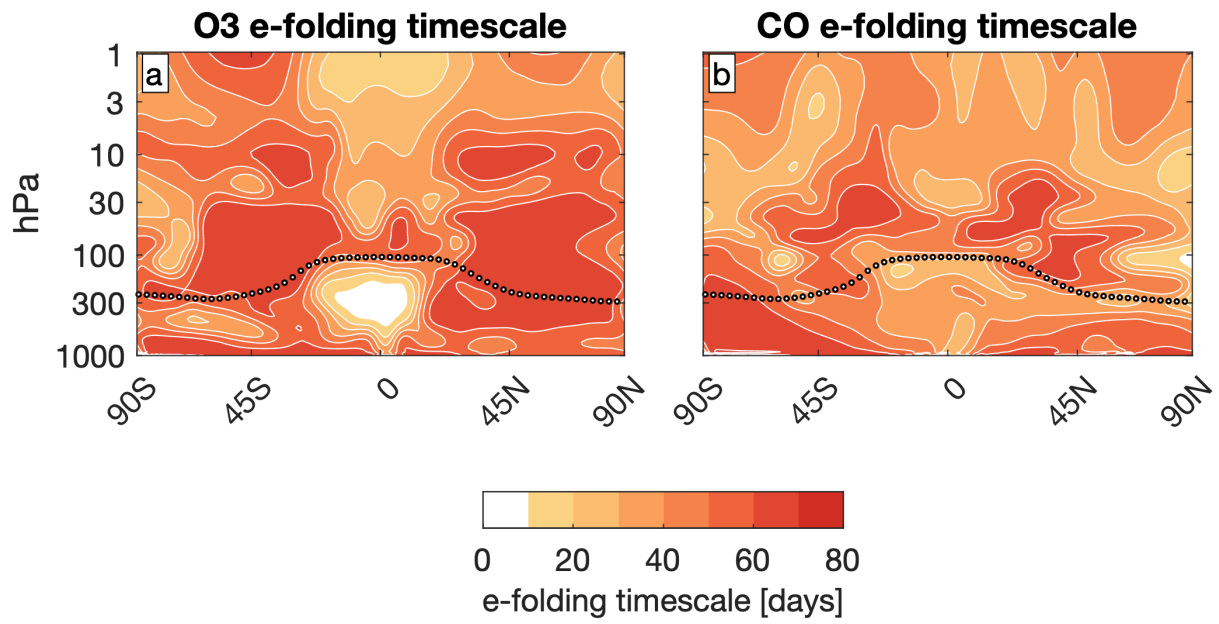

**Fig. S4:** e-folding timescales for (a) ozone and (b) carbon monoxide estimated from the reference simulation. See main text for details.
